# Supplementary material for: Assessing and Improving the Robustness of Bayesian Evidential Learning in One Dimension for Inverting Time-Domain Electromagnetic Data: Introducing a New Threshold Procedure
Source: MDPI journal article supplement (doi:10.3390/w16071056), 2024-04-06
Supplement: s1 [file s1]

Archive with 1 entries (1 files):
- water-2913828-supplementary.pdf
